# Supplementary material for: S100A8/A9 Enhances Immunomodulatory and Tissue-Repairing Properties of Human Amniotic Mesenchymal Stem Cells in Myocardial Ischemia-Reperfusion Injury
Source: MDPI journal article supplement (doi:10.3390/ijms222011175), 2021-10-16
Supplement: s1 [file s1]

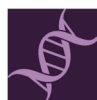

## Supplementary Materials

**Table S1.** The human gene sequences of qPCR. All the primer sequences have validated the function through preliminary RT-PCR.

| Primer ID | Sequences (5'→3')       | TM (°C) | Product        |
|-----------|-------------------------|---------|----------------|
| GAPDH-F   | CCATGTTGCAACCGGGAAG     | 53.2    | NM_001256799.3 |
| GAPDH-R   | GCCCAATACGACCAAATCAGAG  | 54.8    |                |
| CD105-F   | GATAAGGCCCGAGCGCACA     | 52.6    | NM_000118.3    |
| CD105-R   | GTTTCTGCAAGACTTGTGGGG   | 54.4    |                |
| CD14-F    | GAAGACTTATCGACCATGGAGC  | 54.8    | NM_000591.4    |
| CD14-R    | CGCAGCGGAAATCTTCATCG    | 53.8    |                |
| CD19-F    | GTGGTGAAGGTGGAAGAGGG    | 55.9    | NM_001178098.2 |
| CD19-R    | AAGGGTTTAAGCGGGGACTC    | 53.8    |                |
| CD34-F    | GGAGAAAGGCTGGGCGAAG     | 55.4    | NM_001025109.2 |
| CD34-R    | CACACTGGCCTTTCCCTGAG    | 55.9    |                |
| CD45-F    | CTTGGCATTGCTTTGCCT      | 51.8    | NM_001267798.2 |
| CD45-R    | TGCTGTAGTCAATCCAGTGGG   | 54.4    |                |
| CD73-F    | TGAACGCAACAATGGCACAAT   | 50.5    | NM_001204813.2 |
| CD73-R    | GGCCTTCTTCAGGGTGGAAC    | 55.9    |                |
| CD79-F    | GCTGCTGCTGTTTCAGGAAAC   | 53.8    | NM_001783.4    |
| CD79-R    | GTCCAGGTTTCAGGCCTTCAT   | 53.8    |                |
| CD90-F    | GGATGGCGAGTGACTTAGGG    | 55.9    | NM_001311160.2 |
| CD90-R    | TCTCAGTCCTGGATCGGGTT    | 53.8    |                |
| CDH2-F    | AGGCTTCTGGTGAATCGCA     | 51.8    | NM_001308176.2 |
| CDH2-R    | TGCAGTTGCTAAACTTCACATTG | 51.7    |                |
| CRP-F     | CGGACTTTTGGTCATGAAGACAT | 53.5    | NM_000567.3    |
| CRP-R     | AGTGGCTTCTTTGACTCTGCT   | 52.4    |                |
| CCR7-F    | CGTCATGGACCTGGGTATGC    | 55.9    | NM_001301714.2 |
| CCR7-R    | GACCAGAAAGCCGATCACCA    | 53.8    |                |
| GATA4-F   | GGGACTTGGAGGCGGC        | 53.6    | NM_001308093.3 |
| GATA4-R   | AGCCGGGGTCTCTGCTG       | 53.6    |                |
| GATA6-F   | AGAAGCGCGTGCCTTCATC     | 53.2    | NM_005257.6    |
| GATA6-R   | TTTCTGCGCCATAAGGTGGT    | 51.8    |                |
| GDF9-F    | CTTGGAGGTCGTGAGGCTG     | 55.4    | NM_001288824.4 |
| GDF9-R    | GGATGCTCCAGCTGGTCTTT    | 53.8    |                |
| HLADR-F   | CTCCTGCATGGCAGTTCTGA    | 53.8    | NM_001775.4    |
| HLADR-R   | TCCAAGAAACGTGGTCTGGT    | 51.8    |                |
| IDO1-F    | AGATGTCCGTAAGGTCTTGCC   | 54.4    | NM_002164.6    |
| IDO1-R    | AGCTATTTCCAACAGCGCCT    | 51.8    |                |
| IFN-F     | GGAGGAACTGGCAAAAGGATG   | 54.4    | NM_024013.3    |
| IFN-R     | GTTGCTGATGGCCTGATTGT    | 51.8    |                |
| IL10-F    | CGAGATGCCTTCAGCAGAGT    | 53.8    | NM_000572.3    |
| IL10-R    | GAAGAAATCGATGACAGCGCC   | 54.4    |                |
| IL6-F     | CTCATTCTGCTCTGGAGCCC    | 55.9    | NM_000600.5    |
| IL6-R     | CAACTGGATGGAAGTCTCTTGC  | 54.8    |                |
| MMP2-F    | TGCCCCATGAAGCCTTG       | 52.6    | NM_001127891.3 |
| MMP2-R    | TACAGCTGTTGTAGGAGGTGC   | 54.4    |                |
| MMP9-F    | CAGCCGACTTTTGTGGTCTTC   | 54.4    | NM_004994.3    |
| MMP9-R    | GGTACAAGTATGCCTCTGCCA   | 54.4    |                |
| NKX2.5-F  | AAGTGTGCGTCTGCCTTTCC    | 53.8    | NM_001166175.2 |
| NKX2.5-R  | GCGCGCACAGCTCTTTCTTT    | 53.8    |                |
| SPARC1-F  | CAGCCCCTTACTTAAAGGCCATA | 55.3    | NM_001128310.3 |
| SPARC1-R  | CAGCTGCAGTTCCCAAGAGA    | 53.8    |                |
| Spock2-F  | GAAGCCACCCATTACGGTATGA  | 54.8    | NM_001134434.1 |
| Spock2-R  | CTTGTGGATGCACGCAGTTT    | 51.8    |                |

|        |                         |      |             |
|--------|-------------------------|------|-------------|
| TBX5-F | GAGGTGGGATAGTTGGAGAGCAG | 58.8 | NM_000192.3 |
| TBX5-R | GTCTTTTGCCTCAGGCTCCAG   | 56.3 |             |
| TIMP-F | CTGGGACACGCTTAGCATCA    | 53.8 | NM_003254.3 |
| TIMP-R | ACAGCGAGTGATCTTGCACT    | 51.8 |             |
| TLR4-F | CCAAGAACCTGGACCTGAGC    | 55.9 | NM_003266.4 |
| TLR4-R | TGTCTGGATTTACACCTGGA    | 52.4 |             |
| TNF-F  | GTAGCCACGTCGTAGCAAA     | 53.8 | NM_000594.4 |
| TNF-R  | TTGAGATCCATGCCGTTGGC    | 53.8 |             |

**Table S2.** The mouse gene sequences of qPCR. All the primer sequences have validated the function through preliminary RT-PCR.

| Primer ID        | Sequences (5'→3')        | TM (°C) | Product        |
|------------------|--------------------------|---------|----------------|
| GAPDH-F          | AAGAGGGATGCTGCCCTTAC     | 53.8    | NM_001289726.1 |
| GAPDH-R          | TACGGCCAAATCCGTTTACA     | 51.8    |                |
| HMGB1-F          | ATAGGAACTGCGGCCTCTC      | 53.8    | NM_001313894.1 |
| HMGB1-R          | CCCATGTTTAGTTGATTTTCCAGC | 54      |                |
| HSP-60-F         | GGCCCAGGAACCAGCGTAG      | 57.6    | NM_001356512.1 |
| HSP-60-R         | TGGGTAGTCGAAGCATTTTCAGAG | 55.3    |                |
| IL-1 $\alpha$ -F | CGCTTGAGTCGGCAAAGAAAT    | 52.4    | NM_010548.2    |
| IL-1 $\alpha$ -R | TGGCAGAACTGTAGTCTTCGT    | 52.4    |                |
| S100A1-F         | GGGAAAGACGACTAAAAGACAGG  | 55.3    | NM_011309.3    |
| S100A1-R         | ATTCAGCAGCACACGGTTG      | 51.8    |                |
| S100A8-F         | ACAAGGAAATCACCATGCCC     | 51.8    | NM_013650.2    |
| S100A8-R         | TTATATTCTGCACAACTGAGGACA | 52.8    |                |
| S100A9-F         | TTTAGCCTTGAAGAGCAAGAAGA  | 51.7    | NM_001281852.1 |
| S100A9-R         | AAGGTGTCGATGATGGTGGTT    | 52.4    |                |

## Pretreated hAMSC conditioned medium

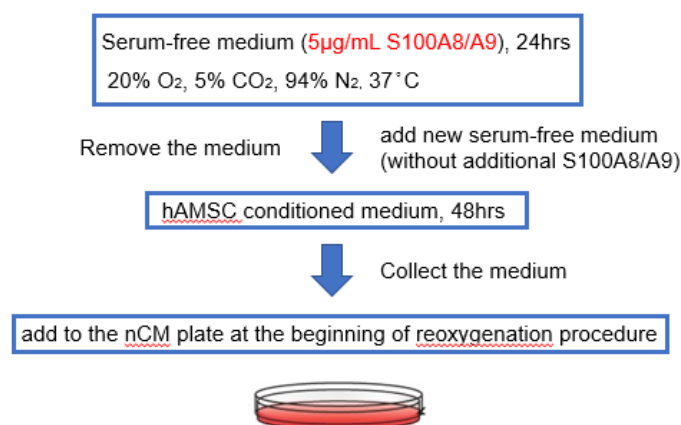

**Figure S1.** The flow scheme of S100A8/A9 pretreated hAMSC conditioned medium collected procedure.

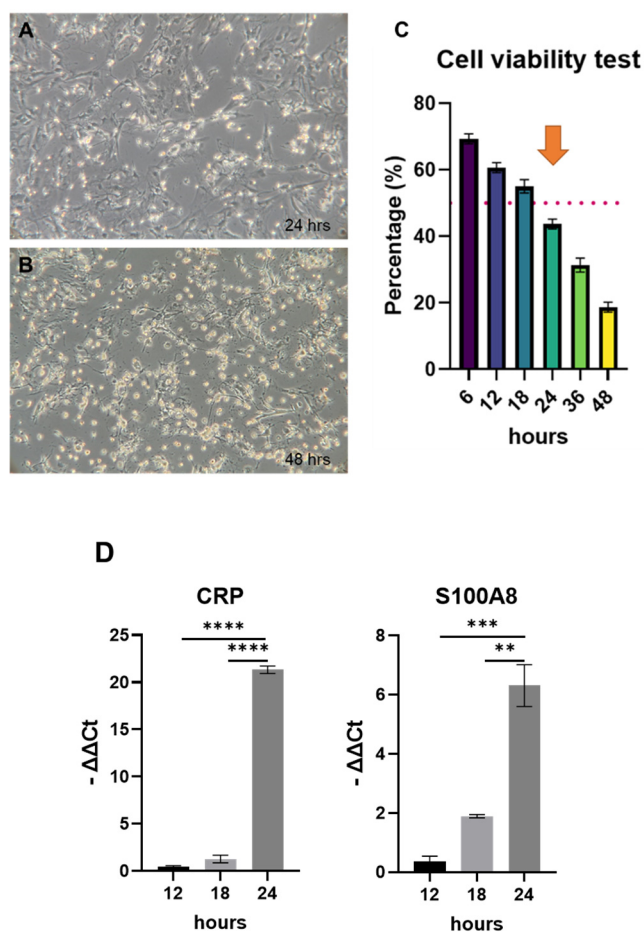

**Figure S2.** Determination of hypoxia condition through cell viability test and qPCR. (A,B) The cell viability images of neonatal mouse cardiomyocytes after 24 and 48 hours hypoxic treatment under microscopic observation. (C) The quantification of cell viability test of different hypoxic timing through trypan blue staining. (D) The comparison of cell injury related CRP and S100A8 gene expression after 12, 18, and 24 hours hypoxic condition through qPCR validation. The significance were calculated using one-way ANOVA. \* $p < 0.05$ , \*\* $p < 0.01$ , \*\*\* $p < 0.001$ , \*\*\*\* $p < 0.0001$ .
